# Supplementary material
Source: HighWire-hosted journal article supplement (https://gocm.bmj.com/content/4/1/e000024)

## 关于临床研究伦理审查范围的说明

我院伦理审查委员会《伦理审查申请 / 报告指南 (ERC SQ/01.01/V4.1)》中规定: 根据国家卫生健康委《涉及人的生物医学研究伦理审查办法》(2016) 等, 所有由我院研究者承担的“涉及人的生物医学研究”项目均应向伦理审查委员会提交伦理审查申请。

《涉及人的生物医学研究伦理审查办法》(2016) 第一章第三条明确规定了“涉及人的生物医学研究”的范围。

我院妇科张果医生对一例“腹膜后血管周围异位妊娠”案例的个案报道和文献回顾不属于我国需要进行伦理审查的“涉及人的生物医学研究”范畴。

特此说明。

此致

敬礼!

北京大学人民医院伦理审查委员会

2022年 月 30 日

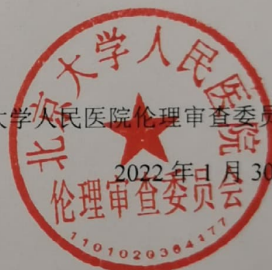

Supplement: inline-supplementary-material-1 [file inline-supplementary-material-1.pdf]
